# Supplementary material for: The Use of Medical Imaging Request Forms as Trigger Tools to Detect Intra-Hospital Adverse Events: A Pilot Study
Source: PubMed Central journal article supplement (PMC9650978; doi:10.5334/jbsr.2897), 2022-11-10
Supplement: jbsr-106-1-2897-s1.pdf [file jbsr-106-1-2897-s1.pdf]

**Supplementary file 1:** Classification of the 16 detected Adverse Events according to category and level of harm

| Trigger Tools                 | AE Detected                                                                            | Florida Hospital AE/Harm Category*                                                                              | Level of Harm**                                                                                                                                                  |
|-------------------------------|----------------------------------------------------------------------------------------|-----------------------------------------------------------------------------------------------------------------|------------------------------------------------------------------------------------------------------------------------------------------------------------------|
| TT <sup>UL</sup>              | 6 ULVT necessitating treatment without prolonged hospitalization                       | <b>Events Related to Patient Care:</b> VTE                                                                      | <b>Category E-</b> An error occurred that may have contributed to or resulted in temporary harm to the patient and required intervention                         |
| TT <sup>LL</sup>              | 1 LLVT necessitating treatment without prolonged hospitalization                       | <b>Events Related to Patient Care:</b> VTE                                                                      | <b>Category E-</b> An error occurred that may have contributed to or resulted in temporary harm to the patient and required intervention                         |
|                               | 3 LLVT necessitating treatment without prolonged hospitalization                       | <b>Events Related to Patient Care:</b> VTE                                                                      | <b>Category F-</b> An error occurred that may have contributed to or resulted in temporary harm to the patient and required initial or prolonged hospitalization |
| TT <sup>CR</sup>              | 1 pneumothorax due to tube malpositioning                                              | <b>Events Related to Surgery or Other Procedure:</b> Respiratory complications related to surgery or procedure. | <b>Category F-</b> An error occurred that may have contributed to or resulted in temporary harm to the patient and required initial or prolonged hospitalization |
|                               | 1 respiratory acidosis post cholecystectomy                                            |                                                                                                                 |                                                                                                                                                                  |
|                               | 1 pre-mature extubation causing re-intubation and escalation in level of care          | <b>Events Related to Surgery or Other Procedure:</b> Premature extubation causing respiratory failure           |                                                                                                                                                                  |
|                               | 1 pneumonia post Whipple surgery                                                       | <b>Hospital Acquired Infections:</b> Postoperative respiratory infection                                        |                                                                                                                                                                  |
|                               | 1 pneumonia post cardiac surgery                                                       |                                                                                                                 |                                                                                                                                                                  |
| 1 hospital acquired pneumonia | <b>Hospital Acquired Infections:</b> Respiratory infection (non-ventilator associated) |                                                                                                                 |                                                                                                                                                                  |

\* Florida Hospital AE/Harm Classification(1) ;

\*\*Levels of Harm according to the NCC MERP index (National Coordinating Council for Medication Error Reporting and Prevention)(9) ; AE: Adverse Event ; LL: Lower Limb; UL: Upper Limb; VTE: Venous Thrombo-embolism

TT<sup>CR</sup>: Repeated requests of Chest radiographs at least 3 times within 24 hrs; TT<sup>LL</sup>: request of a Doppler ultrasound of the lower extremities;

TT<sup>UL</sup>: Request of a Doppler ultrasound of the upper extremities

**Supplementary file 2:** Summary of previous studies addressing the incidence of venous thromboembolism in hospitalized patients

| Authors                                                             | Khanna et al. <sup>10</sup>                           | Jenkins et al. <sup>7</sup>                                               | Assareh et al <sup>8</sup>                               | Khan et al <sup>9</sup> |
|---------------------------------------------------------------------|-------------------------------------------------------|---------------------------------------------------------------------------|----------------------------------------------------------|-------------------------|
| <b>Year of publication</b>                                          | 2014                                                  | 2016                                                                      | 2016                                                     | 2017                    |
| <b>Country</b>                                                      | USA                                                   | USA                                                                       | Australia                                                | Ireland                 |
| <b>Type of Study</b>                                                | Retrospective                                         | Retrospective after intervention                                          | Retrospective                                            | Prospective             |
| <b>Inclusion Criteria</b>                                           | Age > 18 yrs<br>Non-surgical<br>Hospitalisation > 48h | Age >18 yrs<br>Non-psychiatric, Non<br>obstetric<br>Hospitalisation > 48h | Age > 18 yrs<br>Non psychiatric<br>Hospitalisation > 48h | Age > 18 yrs            |
| <b>Number of Admissions</b>                                         | 2,525,068                                             | 73,941                                                                    | 3,331,677                                                | 12,024                  |
| <b>Thrombo-embolism events(deep venous thrombosis and pulmonary</b> | n = 6,297                                             | n=667                                                                     | n = 38,161                                               | n = 48                  |

|                                            |              |         |                         |                                    |
|--------------------------------------------|--------------|---------|-------------------------|------------------------------------|
| <b>embolism)</b>                           |              |         |                         |                                    |
| <b>Age (yrs)</b>                           | 62.5 ± 20.00 | 55.7    | 80.72 % aged ≥ 55 years | 60% aged ≥ 60 years                |
| <b>Sex Ratio</b>                           | F : 49.3%    | NA      | F : 51.9%               | F : 66%                            |
| <b>Length of stay (days)</b>               | 18.7 ± 19.5  | 7.4     | 12 (quartiles: 7–22)    | 81% ranged between 2 and 28 days   |
| <b>Medical vs. Surgical</b>                | NA           | 178/489 | 6.72 % vs 93.28 %       | 66% vs 31%(surgical or obstetrics) |
| <b>Incidence of venous thromboembolism</b> | 0.25 %       | 0.90%   | 1.1%                    | 0.4%                               |
